# Supplementary material
Source: HighWire-hosted journal article supplement (https://www.jrheum.org/highwire/filestream/37743/field_highwire_adjunct_files/0/190644DataSuppl.pdf)
Supplement: 190644DataSuppl.pdf [file 190644DataSuppl.pdf]

## Supplementary Table 1: Cohort and Outcome Definitions

### 1) Juvenile Idiopathic Arthritis:

Defined by at least 2 International Classification of Diseases (ICD) diagnosis codes (7-365 days apart) followed by at least 1 outpatient pharmacy claim for JIA treatment. Index date is the first pharmacy claim initiation date after second ICD diagnosis.

#### A) Diagnosis Codes

|                                                 | ICD-9                                        | ICD-10                                           |
|-------------------------------------------------|----------------------------------------------|--------------------------------------------------|
| Rheumatoid arthritis                            | 714.xx                                       | M05.x, M06.0x, M06.3x, M06.4x, M06.9x, M06.8x    |
| Psoriatic arthritis                             | 696.0                                        | L40.50                                           |
| Ankylosing spondylitis                          | 720.xx                                       | M08.1x                                           |
| Inflammatory bowel disease–associated arthritis | 713.1x with concurrent code 555.xx or 556.xx | M07.60 with concurrent with code K51.90 or K50.x |
| Juvenile arthritis                              |                                              | M08.0x, M08.2x, M08.3x, M08.4x, M08.8x, M08.9x   |

#### B) JIA-related treatment drugs

| Classification       | Brand name/Generic name                                                                                                                                                                                                                                |
|----------------------|--------------------------------------------------------------------------------------------------------------------------------------------------------------------------------------------------------------------------------------------------------|
| Non-selective NSAIDs | Ibuprofen<br>Diclofenac<br>Naproxen<br>Flurbiprofen<br>Ketoprofen<br>Ketorolac<br>Sulindac<br>Piroxicam<br>Oxaprozin<br>Nabumetone<br>Mefenamic acid<br>Meclofenamate<br>Fenoprofen<br>Diflunisal<br>Etodolac<br>Meloxicam<br>Tolmetin<br>Indomethacin |
| Coxibs               | Celecoxib<br>Rofecoxib<br>Valdecoxib                                                                                                                                                                                                                   |
| Steroid (Oral)       | Betamethasone<br>Cortisone<br>Dexamethasone<br>Hydrocortisone<br>Methylprednisolone<br>Paramethasone<br>Prednisolone<br>Prednisone                                                                                                                     |

|                                                  |                                                                                                                                    |
|--------------------------------------------------|------------------------------------------------------------------------------------------------------------------------------------|
|                                                  | Triamcinolone<br>Budesonide                                                                                                        |
| Steroid (Injection)                              | Betamethasone<br>Cortisone<br>Dexamethasone<br>Hydrocortisone<br>Methylprednisolone<br>Prednisolone<br>Prednisone<br>Triamcinolone |
| DMARDs                                           | Methotrexate<br>Sulfasalazine<br>Leflunomide                                                                                       |
| Biologics for JIA (TNF- $\alpha$ inhibitors)     | Adalimumab (J0135)<br>Certolizumab (J0717)<br>Etanercept (J1438)<br>Golimumab (J1602)<br>Infliximab (J1745)                        |
| Biologics for JIA (non-TNF- $\alpha$ inhibitors) | Abatacept (J0129)<br>Tocilizumab (J3262)                                                                                           |

2) Asthma:

Defined by at least 2 ICD diagnosis codes (7-365 days apart) followed by at least 1 outpatient pharmacy claim for asthma treatment. Index date is the first pharmacy claim initiation date after second ICD diagnosis. Exclude ICD diagnosis of asthma during the 365 days prior the index date.

A) Diagnosis Codes

|        | ICD-9  | ICD-10                                         |
|--------|--------|------------------------------------------------|
| Asthma | 493.xx | J45.2x<br>J45.3x<br>J45.4x<br>J45.5x<br>J45.9x |

B) Asthma-related treatment drugs

| Classification  | Brand name/Generic name                                                                                                                                                                                                                                                                                                                                                                                                                                                                                                     |
|-----------------|-----------------------------------------------------------------------------------------------------------------------------------------------------------------------------------------------------------------------------------------------------------------------------------------------------------------------------------------------------------------------------------------------------------------------------------------------------------------------------------------------------------------------------|
| Beta agonist    | <b>Short acting</b> <ul style="list-style-type: none"> <li>- Albuterol</li> <li>- Metaproterenol</li> <li>- Levalbuterol</li> <li>- Pirbuterol</li> </ul> <b>Long acting</b> <ul style="list-style-type: none"> <li>- Salmeterol</li> <li>- Formoterol</li> <li>- Arfomoterol</li> <li>- Indacaterol</li> <li>- Olodaterol</li> </ul> <b>Inhaled beta-agonist combination</b> <ul style="list-style-type: none"> <li>- Albuterol/Ipratropium</li> <li>- Vilanterol/Umeclidinium</li> <li>- Olodaterol/Tiotropium</li> </ul> |
| Inhaled steroid | Beclomethasone HFA                                                                                                                                                                                                                                                                                                                                                                                                                                                                                                          |

|                                 |                                                                                                                                                                                                                                                                                                                                                                                                                                     |
|---------------------------------|-------------------------------------------------------------------------------------------------------------------------------------------------------------------------------------------------------------------------------------------------------------------------------------------------------------------------------------------------------------------------------------------------------------------------------------|
|                                 | Budesonide DPI<br>Budesonide nebulizer<br>Budesonide/formoterol HFA<br>Ciclesonide HFA<br>Flunisolide HFA<br>Fluticasone furoate DPI<br>Fluticasone furoate/vilanterol DPI<br>Fluticasone propionate HFA<br>Fluticasone propionate/salmeterol HFA<br>Fluticasone propionate/salmeterol DPI<br>Fluticasone propionate DPI<br>Mometasone DPI<br>Mometasone/formoterol HFA<br>Triamcinolone acetonide<br>Dexamethasone<br>Prednisolone |
| Oral steroids                   | Betamethasone<br>Cortisone<br>Dexamethasone<br>Hydrocortisone<br>Methylprednisolone<br>Paramethasone<br>Prednisolone<br>Prednisone<br>Triamcinolone<br>Budesonide                                                                                                                                                                                                                                                                   |
| Leukotriene receptor antagonist | Montelukast<br>Zafirlukast                                                                                                                                                                                                                                                                                                                                                                                                          |
| Other alternatives              | Cromolyn<br>Nedocromil<br>Theophylline<br>Zileuton<br>Omalizumab                                                                                                                                                                                                                                                                                                                                                                    |
| Use of nebulizer                | ICD-9P: 93.94<br>ICD-10P: 3E0F76Z c<br>CPT: 94640, 94644, 94664 (E/M)<br>HCPCS: E0570, A7003, A7004, A7005, A7013, A7014, A7015, A4627                                                                                                                                                                                                                                                                                              |
| Immunotherapy                   | CPT: 95115, 95117, 95120, 95125, 95144, 95145, 95146, 95147, 95148, 95149, 95165, 95170                                                                                                                                                                                                                                                                                                                                             |

\* Combination drugs – i.e. salmeterol/fluticasone – will be captured in 2 groups; once with beta agonist and once with inhaled steroid.

### 3) Healthy control:

Defined by at least 1 ICD diagnosis code or Current Procedural Terminology (CPT) code for Well-Care Visit. Index date is the first date of diagnosis code.

No JIA or asthma during the 365 days prior the index date based on ICD diagnosis code.

#### A) Diagnosis Codes

|  | ICD-9 | ICD-10 | CPT |
|--|-------|--------|-----|
|--|-------|--------|-----|

|                 |                                                        |                                                                                                                                                        |                                     |
|-----------------|--------------------------------------------------------|--------------------------------------------------------------------------------------------------------------------------------------------------------|-------------------------------------|
| Healthy control | V20.2, V20.3, V70.0, V70.3, V70.5, V70.6, V70.8, V70.9 | Z00.00, Z00.01, Z00.121, Z00.129, Z00.5, Z00.8, Z02.0, Z02.1, Z02.2, Z02.3, Z02.4, Z02.5, Z02.6, Z02.71, Z02.79, Z02.81, Z02.82, Z02.83, Z02.89, Z02.9 | 99381 - 99385, 99391 - 99395, 99461 |
|-----------------|--------------------------------------------------------|--------------------------------------------------------------------------------------------------------------------------------------------------------|-------------------------------------|

#### 4) Diabetes mellitus:

New diagnosis of Type 1 or Type 2 DM by ICD diagnosis followed by prescription claim for Insulin-containing drugs only in type 1 DM and any anti-diabetic drug or insulin-containing DM drug in Type 2.

##### A) Diagnosis Codes

|        | ICD-9            | ICD-10 |
|--------|------------------|--------|
| Type 1 | 250.x1, 250.x3   | E10.x  |
| Type 2 | 250.x0 or 250.x2 | E11.x  |

Exclude other types of DM (ICD-10: E08, E09, E13, Z96.41; ICD-9: 249.xx)

##### B) DM-related treatment drugs

| Antidiabetic drug therapy               | Medication                                                                                                                                                                                                                                                                                                                                    |
|-----------------------------------------|-----------------------------------------------------------------------------------------------------------------------------------------------------------------------------------------------------------------------------------------------------------------------------------------------------------------------------------------------|
| Bolus Insulin                           | Insulin human regular<br>Insulin Aspart<br>Insulin Glulisine<br>Insulin Lispro<br>Insulin Aspart/Insulin Aspart Protamine<br>Insulin Lispro/Insulin Lispro Protamine<br>insulin,pork purified                                                                                                                                                 |
| Basal Insulin                           | Insulin human isophane (NPH)<br>Insulin human regular/ Insulin human isophane (NPH)<br>Insulin Detemir<br>Insulin Glargine<br>Insulin Degludec<br>Insulin zinc human rec<br>Insulin zinc extend human rec<br>Insulin nph human recom/insulin regular human rec<br>Insulin zinc human rec<br>Insulin nph human recom/insulin regular human rec |
| Metformin                               | Metformin                                                                                                                                                                                                                                                                                                                                     |
| DDP4 inhibitors                         | Alogliptin, Linagliptin, Saxagliptin, Sitagliptin                                                                                                                                                                                                                                                                                             |
| Sulfonylureas                           | Acetohexamide, Chlorpropamide, tolazamide, tolbutamide, Glipizide, Glyburide, Glimepiride                                                                                                                                                                                                                                                     |
| Meglitinide derivatives                 | Repaglinide, Nateglinide                                                                                                                                                                                                                                                                                                                      |
| Alpha-glucosidase inhibitors            | Acarbose, Miglitol                                                                                                                                                                                                                                                                                                                            |
| Thiazolidinediones (TZDs)               | Rosiglitazone, Pioglitazone                                                                                                                                                                                                                                                                                                                   |
| Glucagonlike peptide-1 (GLP-1) agonists | Exenatide, Liraglutide, Lixisenatide, Albiglutide, Dulaglutide, semaglutide                                                                                                                                                                                                                                                                   |
| SGLT2 inhibitors                        | Canagliflozin, Dapagliflozin, Empagliflozin, Ertugliflozin                                                                                                                                                                                                                                                                                    |
| Pramlintide                             | Pramlintide                                                                                                                                                                                                                                                                                                                                   |

**Supplementary Figure 1: Flow Chart Illustrating Selection of Primary Cohorts.**

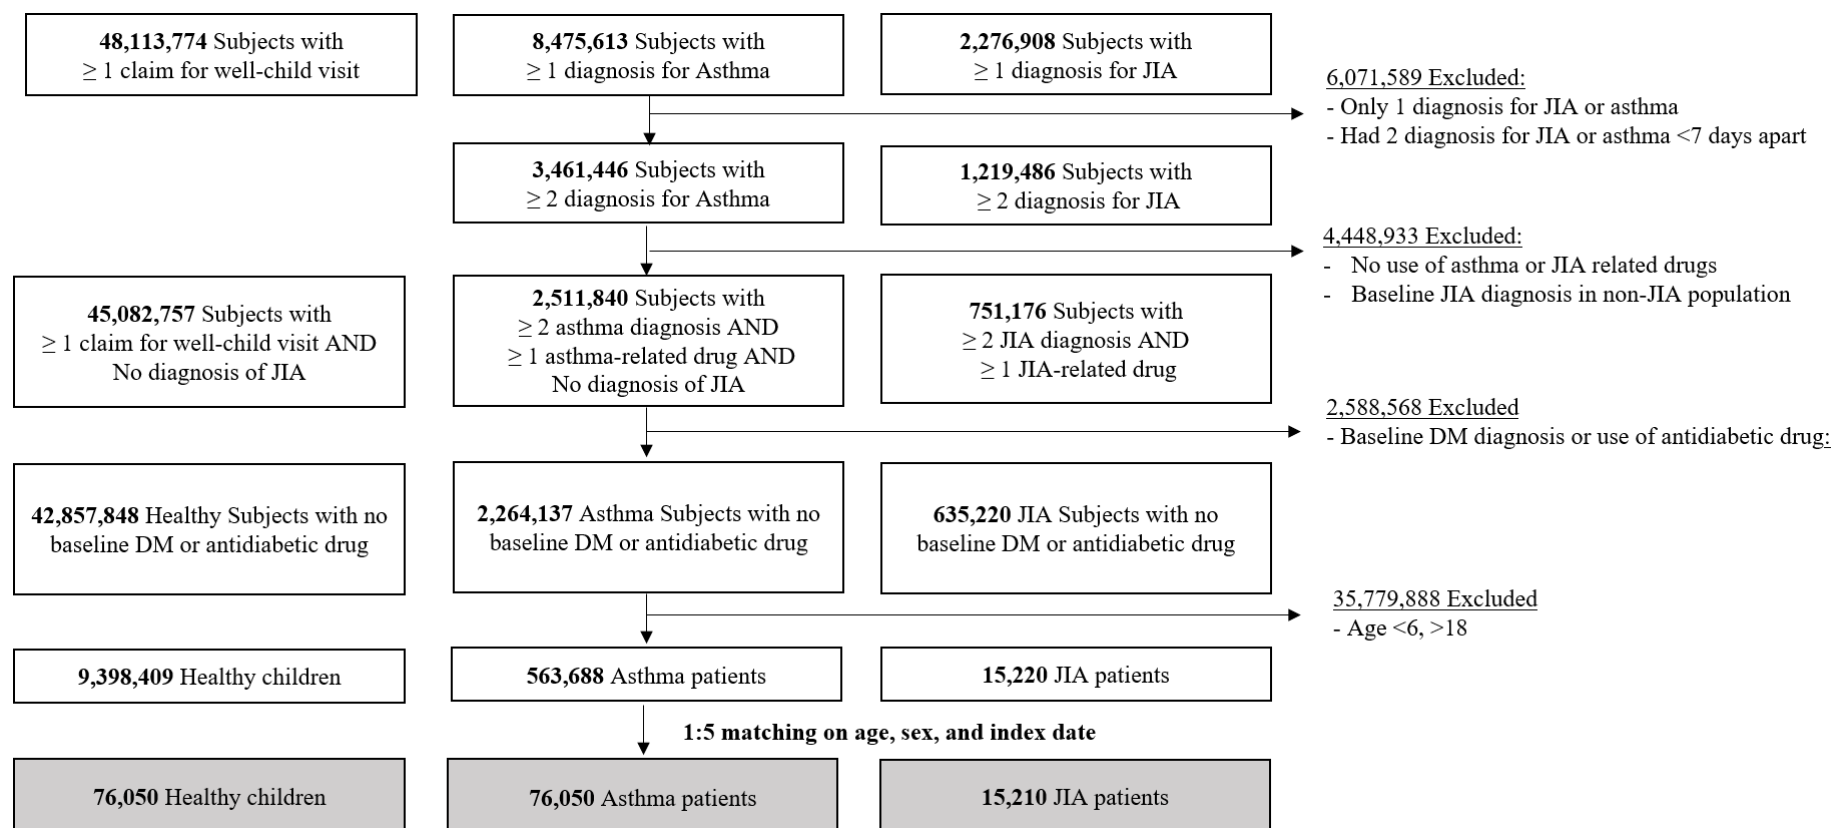

**Supplementary Table 2: Hazard ratio of diabetes mellitus in patients with JIA compared to healthy population and asthma patients, stratified by age**

|                 | <b>JIA vs Asthma</b>       |                             | <b>JIA vs Healthy Children</b> |                             |
|-----------------|----------------------------|-----------------------------|--------------------------------|-----------------------------|
|                 | HR in Age 6-12<br>(95% CI) | HR in Age 13-18<br>(95% CI) | HR in Age 6-12<br>(95% CI)     | HR in Age 13-18<br>(95% CI) |
| Type 1 DM       | 1.29<br>(0.51-3.29)        | 1.63<br>(0.83-3.22)         | 1.28<br>(0.51-3.22)            | 2.39<br>(1.17-4.91)         |
| Type 2 DM       | 0.95<br>(0.39-2.33)        | 1.04<br>(0.64-1.68)         | 1.11<br>(0.44-2.81)            | 1.27<br>(0.77-2.10)         |
| Composite<br>DM | 1.17<br>(0.53-2.59)        | 1.19<br>(0.76-1.84)         | 1.28<br>(0.57-2.87)            | 1.49<br>(0.94-2.35)         |

Abbreviations: JIA, Juvenile idiopathic arthritis; DM, Diabetes mellitus; HR, Hazard ratio; CI, Confidence interval
